# Supplementary material for: Anti-leukemic effect of CDK9 inhibition in T-cell prolymphocytic leukemia
Source: PubMed Central journal article supplement — Ther Adv Hematol. 2020 Oct 13;11:2040620720933761. doi: 10.1177/2040620720933761 (PMC7570784; doi:10.1177/2040620720933761), 2020-10-13
Supplement: Supplement_to_CDK9_inhibition_in_T-PLL_2020-03-20.pdf [file Supplement_to_CDK9_inhibition_in_T-PLL_2020-03-20.pdf]

## Supplement to

### **Anti-leukemic effect of CDK9 inhibition in T-cell prolymphocytic leukemia**

Patricia Johansson<sup>1</sup>, Laura Dierichs<sup>2,6</sup>, Ludger Klein-Hitpass<sup>3</sup>, Anke K. Bergmann<sup>4</sup>, Michael Möllmann<sup>1</sup>, Sascha Menninger<sup>5</sup>, Peter Habenberger<sup>5</sup>, Bert Klebl<sup>5</sup>, Jens T. Siveke<sup>2,6</sup>, Ulrich Dührsen<sup>1</sup>, Axel Choidas<sup>5</sup> and Jan Dürig<sup>1,7</sup>

<sup>1</sup>Department of Hematology, University Hospital Essen, University of Duisburg-Essen, Essen, Germany; Institute for Developmental Cancer Therapeutics, West German Cancer Center, University Hospital Essen, Essen, Germany; <sup>3</sup>Institute of Cell Biology (Cancer Research), University Hospital Essen, University of Duisburg-Essen, Essen, Germany; <sup>4</sup>Department of Human Genetics, Hannover Medical School, Hannover, Germany; <sup>5</sup>Lead Discovery Center GmbH, Dortmund, Germany; <sup>6</sup>Division of Solid Tumor Translational Oncology, German Cancer Consortium (DKTK, partner site Essen) and German Cancer Research Center, DKFZ, Heidelberg, Germany; <sup>7</sup>German Cancer Consortium (DKTK) partner site Essen and German Cancer Research Center (DKFZ), Heidelberg, Germany

## Supplemental Tables

Please see separate Excel files

## Supplemental Figures

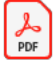

Figure S1.pdf

### **Figure S1. Transcriptomic profiling identifies deregulated molecular pathways in T-PLL**

Comparative GEP of ten T-PLL vs five HD CD3<sup>+</sup> T-cell samples yielded 674 differentially expressed genes ( $FC \geq 2$  or  $FC \leq -2$ ,  $p \leq 0.05$ ), which were subsequently subjected to the core analysis of IPA.

### **Figure S2. Gene expression profiling of T-PLL cells treated with LDC526**

Genes down-regulated in T-PLL in response to LDC526 (10  $\mu$ M) were analyzed in a GO enrichment analysis. A, fold enrichment of the 25 most significant (FDR <0.05) GO terms in the category biological process. B, Significantly (FDR <0.5) enriched molecular function GO terms.

### **Figure S3. RT-qPCR analysis of BCL2 expression in T-PLL cells cultured for 90 min in the absence (DMSO Control) or presence of LDC526 (10 $\mu$ M)**
